# Supplementary material for: Electronic Patient-Reported Outcome Monitoring to Improve Quality of Life After Joint Replacement: Secondary Analysis of a Randomized Clinical Trial
Source: PubMed Central journal article supplement (PMC10474554; doi:10.1001/jamanetworkopen.2023.31301), 2023-09-01
Supplement: jamanetwopen-e2331301-s003.pdf [file jamanetwopen-e2331301-s003.pdf]

## Data Sharing Statement

Steinbeck. Electronic Patient-Reported Outcome Monitoring to Improve Quality of Life After Joint Replacement. *JAMA Netw Open*. Published September 01, 2023.

doi:10.1001/jamanetworkopen.2023.31301

### Data

**Data available:** No

### Additional Information

**Explanation for why data not available:** It is not allowed to make the data accessible due to the German data protection law and the data protection agreements within the trial.
